# Supplementary material
Source: ML conference proceedings conference paper supplement (https://proceedings.mlr.press/v54/jiang17b.html)
Supplement: Supplementary file [file jiang17b-supp.pdf]

## Appendix A. Proof of Theorem 1

In this appendix, we first derive a canonical form of the pencil  $L_G - \lambda L_H$ , and then prove the variational principle in Theorem 1. For the simplicity of notation, in this appendix, we denote  $A = L_G$  and  $B = L_H$ . We begin with the following lemma.

**Lemma 1.** *If  $A - \lambda B$  is a symmetric matrix pencil of order  $n$  with  $A \succeq 0$  and  $B \succeq 0$ , then there exists an orthogonal matrix  $Q \in \mathbb{R}^{n \times n}$  such that*

$$Q^T A Q = \begin{matrix} & \begin{matrix} r & n_1 & m \end{matrix} \\ \begin{matrix} r \\ n_1 \\ m \end{matrix} & \begin{bmatrix} \widehat{A}_{11} & \widehat{A}_{12} & \\ \widehat{A}_{12}^T & \widehat{A}_{22} & \\ & & 0 \end{bmatrix} \end{matrix} \equiv \begin{matrix} & \begin{matrix} r+n_1 & m \end{matrix} \\ \begin{matrix} r+n_1 \\ m \end{matrix} & \begin{bmatrix} \widehat{A} & \\ & 0 \end{bmatrix}, \quad (1)$$

$$Q^T B Q = \begin{matrix} & \begin{matrix} r & n_1 & m \end{matrix} \\ \begin{matrix} r \\ n_1 \\ m \end{matrix} & \begin{bmatrix} \widehat{B}_{11} & & \\ & 0 & \\ & & 0 \end{bmatrix} \end{matrix} \equiv \begin{matrix} & \begin{matrix} r+n_1 & m \end{matrix} \\ \begin{matrix} r+n_1 \\ m \end{matrix} & \begin{bmatrix} \widehat{B} & \\ & 0 \end{bmatrix}, \quad (2)$$

where  $\widehat{A}_{22} \succ 0$  and  $\widehat{B}_{11} \succ 0$ . Furthermore, the sub-pencil  $\widehat{A} - \lambda \widehat{B}$  is regular and  $\widehat{A} \succeq 0$  and  $\widehat{B} \succeq 0$ .

*Proof.* Since  $B \succeq 0$ , there exists an orthogonal matrix  $Q_1 \in \mathbb{R}^{n \times n}$  such that

$$B^{(0)} \equiv Q_1^T B Q_1 = \begin{matrix} & \begin{matrix} r & d \end{matrix} \\ \begin{matrix} r \\ d \end{matrix} & \begin{bmatrix} \widehat{B}_{11} & \\ & 0 \end{bmatrix}, \quad (3)$$

where  $\widehat{B}_{11} \succ 0$ . Applying transformation  $Q_1$  to matrix  $A$ , we have

$$A^{(0)} \equiv Q_1^T A Q_1 = \begin{matrix} & \begin{matrix} r & d \end{matrix} \\ \begin{matrix} r \\ d \end{matrix} & \begin{bmatrix} \widehat{A}_{11} & A_{12} \\ A_{12}^T & A_{22} \end{bmatrix}.$$

Note that  $A_{22} \succeq 0$  due to the fact that  $A \succeq 0$ .

For the  $d \times d$  block matrix  $A_{22}$ , there exists an orthogonal matrix  $Q_{22} \in \mathbb{R}^{d \times d}$  such that

$$Q_{22}^T A_{22} Q_{22} = \begin{matrix} & \begin{matrix} n_1 & m \end{matrix} \\ \begin{matrix} n_1 \\ m \end{matrix} & \begin{bmatrix} \widehat{A}_{22} & \\ & 0 \end{bmatrix},$$

where  $\widehat{A}_{22} \succ 0$ .

Let  $Q_2 = \text{diag}(I_r, Q_{22})$ . Then we have

$$A^{(1)} \equiv Q_2^T A^{(0)} Q_2 = \begin{matrix} & \begin{matrix} r & n_1 & m \end{matrix} \\ \begin{matrix} r \\ n_1 \\ m \end{matrix} & \begin{bmatrix} \widehat{A}_{11} & \widehat{A}_{12} & \widehat{A}_{13} \\ \widehat{A}_{12}^T & \widehat{A}_{22} & \\ \widehat{A}_{13}^T & & 0 \end{bmatrix},$$

$$B^{(1)} \equiv Q_2^T B^{(0)} Q_2 = \begin{matrix} & \begin{matrix} r & n_1 & m \end{matrix} \\ \begin{matrix} r \\ n_1 \\ m \end{matrix} & \begin{bmatrix} \widehat{B}_{11} & & \\ & 0 & \\ & & 0 \end{bmatrix},$$

where  $[\widehat{A}_{12}, \widehat{A}_{13}] = A_{12} Q_{22}$ . Note that since  $A^{(1)} \succeq 0$ , we must have  $\widehat{A}_{13} = 0$ . Otherwise, if there exists an element  $a_{ij} \neq 0$  in  $\widehat{A}_{13}$ , then the 2 by 2 sub-matrix  $\begin{bmatrix} \widehat{a}_{ii} & a_{ij} \\ a_{ij} & 0 \end{bmatrix}$  of  $A^{(1)}$  is indefinite, where  $\widehat{a}_{ii}$  is the  $i$ -th diagonal element of  $\widehat{A}_{11}$ . This contradicts to the positive semi-definiteness of  $A^{(1)} \succeq 0$ .

Denote  $Q = Q_1 Q_2$ . Then  $Q$  is orthogonal, and  $Q^T A Q$ ,  $Q^T B Q$  have the form (1).

Finally, we show the pencil  $\widehat{A} - \lambda \widehat{B}$  is regular. For any  $\lambda \in \mathbb{C}$ , straightforward calculation gives that

$$\begin{aligned} \det(\widehat{A} - \lambda \widehat{B}) &= \det \begin{pmatrix} \widehat{A}_{11} - \lambda \widehat{B}_{11} & \widehat{A}_{12} \\ \widehat{A}_{12}^T & \widehat{A}_{22} \end{pmatrix} \\ &= \det \begin{pmatrix} \widehat{A}_{11} - \widehat{A}_{12} \widehat{A}_{22}^{-1} \widehat{A}_{12}^T - \lambda \widehat{B}_{11} & \\ & \widehat{A}_{22} \end{pmatrix} \\ &= \det(\widehat{A}_{22}) \det(\widehat{A}_{11} - \widehat{A}_{12} \widehat{A}_{22}^{-1} \widehat{A}_{12}^T - \lambda \widehat{B}_{11}). \end{aligned}$$

Recall that  $\widehat{A}_{22} \succ 0$ . Furthermore, since  $\widehat{B}_{11} \succ 0$ ,  $\det(\widehat{A}_{11} - \widehat{A}_{12} \widehat{A}_{22}^{-1} \widehat{A}_{12}^T - \lambda \widehat{B}_{11}) \neq 0$ . Hence,  $\det(\widehat{A} - \lambda \widehat{B}) \neq 0$ . This means the pencil  $\widehat{A} - \lambda \widehat{B}$  is regular.  $\square$

By Lemma 1, we have the following canonical form of the matrix pair  $\{A, B\}$  to show that the matrices  $A$  and  $B$  are simultaneously diagonalizable with a congruence transformation.

**Lemma 2.** *If  $A - \lambda B$  is a symmetric matrix pencil of order  $n$  with  $A \succeq 0$  and  $B \succeq 0$ , then there exists a nonsingular matrix  $X \in \mathbb{R}^{n \times n}$  such that*

$$X^T A X = \begin{matrix} r & n_1 & m \\ \Lambda_r & & \\ & I & \\ & & 0 \end{matrix}, \quad X^T B X = \begin{matrix} r & n_1 & m \\ I & & \\ & 0 & \\ & & 0 \end{matrix}, \quad (4)$$

where  $\Lambda_r$  is a diagonal matrix of non-negative diagonal elements  $\lambda_1, \dots, \lambda_r$ ,  $r = \text{rank}(B)$ ,  $m = \dim(\mathcal{N}(A) \cap \mathcal{N}(B))$  and  $n_1 = \dim(\mathcal{N}(B)) - m$ .

*Proof.* By Lemma 1, there exists an orthogonal matrix  $Q \in \mathbb{R}^{n \times n}$  such that

$$A^{(1)} \equiv Q^T A Q = \begin{matrix} r & n_1 & m \\ \widehat{A}_{11} & \widehat{A}_{12} & \\ \widehat{A}_{12}^T & \widehat{A}_{22} & \\ & & 0 \end{matrix} \quad \text{and} \quad B^{(1)} \equiv Q^T B Q = \begin{matrix} r & n_1 & m \\ \widehat{B}_{11} & & \\ & 0 & \\ & & 0 \end{matrix}.$$

Let

$$X_1 = \begin{bmatrix} I_r & & \\ -\widehat{A}_{22}^{-1} \widehat{A}_{12}^T & \widehat{A}_{22}^{-1/2} & \\ & & I_s \end{bmatrix}.$$

Then

$$A^{(2)} \equiv X_1^T A^{(1)} X_1 = \begin{bmatrix} \widehat{A}_{11} - \widehat{A}_{12}^{(1)} \widehat{A}_{22}^{-1} \widehat{A}_{12}^T & & \\ & I_{n_1} & \\ & & 0_s \end{bmatrix} \quad \text{and} \quad B^{(2)} \equiv X_1^T B^{(1)} X_1 = \begin{bmatrix} \widehat{B}_{11} & & \\ & 0_{n_1} & \\ & & 0_s \end{bmatrix}.$$

Since  $\widehat{B}_{11} \succ 0$ , there exists a nonsingular matrix  $\widehat{X}_2$  such that

$$\widehat{X}_2^T [\widehat{A}_{11} - \widehat{A}_{12}^{(1)} \widehat{A}_{22}^{-1} \widehat{A}_{12}^T] \widehat{X}_2 = \Lambda, \quad \widehat{X}_2^T \widehat{B}_{11} \widehat{X}_2 = I_r.$$

Let  $X_2 = \text{diag}(\widehat{X}_2, I_{n_1}, I_s)$ . Then we have

$$X_2^T A^{(2)} X_2 = \text{diag}(\Lambda, I_{n_1}, 0_s), \quad X_2^T B^{(2)} X_2 = \text{diag}(I_r, 0_{n_1}, 0_s).$$

Denote  $X = Q X_1 X_2$ . Then we obtain (4). The remaining results are easily obtained from the canonical form (2).  $\square$

The following remarks are in order:

1. By Lemma 2, we know (i) there are  $r = \text{rank}(B)$  finite eigenvalues of the pencil  $A - \lambda B$  and all finite eigenvalues are real, nonnegative and non-defective. and (ii) there are  $n_1 = \dim(\mathcal{N}(B)) - \dim(\mathcal{N}(A) \cap \mathcal{N}(B))$  non-defective infinite eigenvalues.
2. The canonical form (4) has been derived in [Newcomb, 1961]. Here we give the values of indices  $r$ ,  $n_1$ ,  $m$  in (4) and our proof seems more compact.
3. Lemma 3.8 in [Liang et al., 2013] deals with the canonical form of a general positive semi-definite pencil. Obviously, the pencil  $A - \lambda B$  considered here is a special case of positive semi-definite pencil. So Lemma 3.8 is applicable here. Our proof is constructive based on Fix-Heiberger's reduction [Fix and Heiberger, 1972].

We now provide a proof of the variational principle in Theorem 1. Without loss of generality, we assume that pencil  $A - \lambda B$  is in the canonical form (4), i.e.,

$$A = \begin{matrix} & r & n_1 & m \\ \begin{matrix} r \\ n_1 \\ m \end{matrix} & \begin{bmatrix} \Lambda_r & & \\ & I & \\ & & 0 \end{bmatrix} \end{matrix}, \quad B = \begin{matrix} & r & n_1 & m \\ \begin{matrix} r \\ n_1 \\ m \end{matrix} & \begin{bmatrix} I & & \\ & 0 & \\ & & 0 \end{bmatrix} \end{matrix}. \quad (5)$$

Let  $\mathcal{X} \subseteq \mathbb{R}^n$  be a subspace of dimension  $n+1-i$ , where  $1 \leq i \leq r$  and  $x \in \mathcal{X}$  be partitioned into  $x = [x_1^T, x_2^T, x_3^T]^T$  conformally with the form (5), then

$$\inf_{\substack{x \in \mathcal{X} \\ x^T B x > 0}} \frac{x^T A x}{x^T B x} = \inf_{\substack{x \in \mathcal{X} \\ x_1^T x_1 > 0}} \frac{x_1^T \Lambda_r x_1 + x_2^T x_2}{x_1^T x_1} = \inf_{\substack{x \in \mathcal{X} \\ x_1^T x_1 > 0}} \frac{x_1^T \Lambda_r x_1}{x_1^T x_1}. \quad (6)$$

Let  $\mathcal{X}^{(1)} = \{[I_r, 0_{n-r}]x \mid x \in \mathcal{X}\}$ . Evidently,  $\mathcal{X}^{(1)}$  is a subspace of  $\mathbb{R}^r$ . Moreover,

$$n+1-i \geq \dim(\mathcal{X}^{(1)}) \geq n+1-i-n_1-s = r+1-i.$$

Then there exists a subspace  $\tilde{\mathcal{X}} \subseteq \mathbb{R}^r$  of dimension  $r+1-i$  such that  $\tilde{\mathcal{X}} \subseteq \mathcal{X}^{(1)}$ . For the matrix  $\Lambda_r$ , by Courant-Fischer min-max principle, we have

$$\inf_{\substack{x \in \mathcal{X} \\ x_1^T x_1 > 0}} \frac{x_1^T \Lambda_r x_1}{x_1^T x_1} = \min_{\substack{x_1 \in \mathcal{X}^{(1)} \\ x_1^T x_1 > 0}} \frac{x_1^T \Lambda_r x_1}{x_1^T x_1} \leq \min_{\substack{x_1 \in \tilde{\mathcal{X}} \\ x_1^T x_1 > 0}} \frac{x_1^T \Lambda_r x_1}{x_1^T x_1} \leq \max_{\substack{\dim(\mathcal{S})=r+1-i \\ \mathcal{S} \subseteq \mathbb{R}^r}} \min_{\substack{x_1 \in \mathcal{S} \\ x_1^T x_1 > 0}} \frac{x_1^T \Lambda_r x_1}{x_1^T x_1} = \lambda_i.$$

Combining above equation with (6), we know that for any subspace  $\mathcal{X} \subseteq \mathbb{R}^n$  with dimension  $n+1-i$ ,

$$\min_{\substack{x \in \mathcal{X} \\ x^T B x > 0}} \frac{x^T A x}{x^T B x} \leq \lambda_i. \quad (7)$$

On the other hand, let us consider a special choice of the subspace  $\mathcal{X}$ :

$$\mathcal{S}_i = \mathcal{R}(S_i),$$

where

$$S_i = \begin{matrix} & r+1-i & n-r \\ \begin{matrix} i-1 \\ r+1-i \\ n-r \end{matrix} & \begin{bmatrix} 0 & & \\ I & 0 & \\ & & I \end{bmatrix} \end{matrix}.$$

Then  $\dim(\mathcal{S}_i) = n+1-i$ , and

$$S_i^T A S_i = \text{diag}(\tilde{\Lambda}_i, I_{n_1}, 0_s), \quad S_i^T B S_i = \text{diag}(I_{r+1-i}, 0_{n_1}, 0_s),$$

where  $\tilde{\Lambda}_i = \text{diag}(\lambda_i, \dots, \lambda_r)$ . Let  $x_* = S_i e_1 \in \mathcal{S}_i$ , where  $e_1$  is a unit vector of dimension  $n+r-i$ , then

$$\frac{x_*^T A x_*}{x_*^T B x_*} = \lambda_i.$$

Consequently, Eq.17 (Sec.4) follows from above equation and (7). Taking  $i = 1$  in (7), we get Eq.18 (Sec.4).

## Appendix B. Proof of Theorem 2

Similar to Appendix A, for the simplicity of notation, we denote  $A = L_G$  and  $B = L_H$ . By the definitions of  $K$  and  $M$  in Theorem 2, we have

$$K = -B, \quad M = A + \mu B + ZSZ^T.$$

By Lemma 1, there exists an orthogonal matrix  $Q \in \mathbb{R}^{n \times n}$  such that

$$Q^T A Q = \begin{matrix} n-m & m \\ \hat{A} & \\ m & 0 \end{matrix}, \quad Q^T B Q = \begin{matrix} n-m & m \\ \hat{B} & \\ m & 0 \end{matrix}, \quad (8)$$

where the  $(n-m) \times (n-m)$  sub-pencil  $\hat{A} - \lambda \hat{B}$  is regular and  $\hat{A} \succeq 0$  and  $\hat{B} \succeq 0$ .

Let  $Q$  in (8) be conformally partitioned in the form  $Q = [Q_1, Q_2]$ , where  $Q_2 \in \mathbb{R}^{n \times m}$ . Then  $Q_2$  is also an orthonormal basis of  $\mathcal{N}(A) \cap \mathcal{N}(B)$ , i.e.,

$$Z = Q_2 G \quad (9)$$

for some orthogonal matrix  $G$ .

For the regular pair  $\{\hat{A}, \hat{B}\}$ , by Lemma 2, there exists a nonsingular matrix  $\tilde{X} \in \mathbb{R}^{(n-m) \times (n-m)}$  such that

$$\tilde{X}^T \hat{A} \tilde{X} = \text{diag}(\Lambda_r, I_{n_1}), \quad \tilde{X}^T \hat{B} \tilde{X} = \text{diag}(I_r, 0_{n_1}), \quad (10)$$

where  $\Lambda_r = \text{diag}(\lambda_1, \dots, \lambda_r) \succeq 0$ .

Let  $X = Q \text{diag}(\tilde{X}, I_m)$ . Then

$$\begin{aligned} X^T K X &= \text{diag}(\tilde{X}^T, I_m) Q^T (-B) Q \text{diag}(\tilde{X}, I_m) \\ &= \text{diag}(\tilde{X}^T, I_m) \text{diag}(-\hat{B}, 0_m) \text{diag}(\tilde{X}^T, I_m) \quad \text{by (8)} \\ &= \text{diag}(-I_r, 0_{n_1}, 0_m) \quad \text{by (10)}, \end{aligned}$$

and

$$\begin{aligned} X^T M X &= \text{diag}(\tilde{X}^T, I_m) Q^T (A + \mu B + ZSZ^T) Q \text{diag}(\tilde{X}, I_m) \\ &= \text{diag}(\tilde{X}^T, I_m) \text{diag}(\hat{A} + \mu \hat{B}, GSG^T) \text{diag}(\tilde{X}, I_m) \quad \text{by (8) and (9)} \\ &= \text{diag}(\Lambda_r + \mu I_r, I_{n_1}, GSG^T) \quad \text{by (10)}. \end{aligned}$$

Since  $\Lambda_r \succeq 0$ ,  $S > 0$  and  $\mu > 0$ ,  $M \succ 0$ . The nonzero eigenvalues of the pencil  $K - \sigma M$  are  $\sigma_i = -1/(\lambda_i + \mu)$  for  $i = 1, \dots, r$ .

## References

- [Fix and Heiberger, 1972] Fix, G. and Heiberger, R. (1972). An algorithm for the ill-conditioned generalized eigenvalue problem. *SIAM Journal on Numerical Analysis*, 9:78–88.
- [Liang et al., 2013] Liang, X., Li, R.-C., and Bai, Z. (2013). Trace minimization principles for positive semi-definite pencils. *Linear Algebra and its Applications*, 438:3085–3106.
- [Newcomb, 1961] Newcomb, R. W. (1961). On the simultaneous diagonalization of two semi-definite matrices. *Quarterly of Applied Mathematics*, 19:144–146.
